# Supplementary material for: Stacking interaction in the middle and at the end of a DNA helix studied with non-natural nucleotides
Source: Royal Society of Chemistry journal article supplement (doi:10.1039/c0mb00002g), 2010-08-09
Supplement: c0mb00002g.pdf [file c0mb00002g.pdf]

## Stacking interaction in the middle and at the end of a DNA helix studied with non-natural nucleotides

Shu-ichi Nakano, Hirohito Oka, Yuuki Uotani, Kazuya Uenishi, Masayuki Fujii and Naoki Sugimoto

*Faculty of Frontiers of Innovative Research in Science and Technology (FIRST), Frontier Institute for Biomolecular Engineering Research (FIBER), and Department of Chemistry, Faculty of Science and Engineering, Konan University, 7-1-20, Minatojima-minamimachi, Chuo-ku, Kobe 650-0047, Japan*

*Molecular Engineering Institute (MEI) and Department of Environmental and Biological Chemistry, Kinki University, 11-6 Kayanomori, Iizuka, Fukuoka 820-8555, Japan*

### Supplementary information

**Table S1** Thermodynamic parameters for DNA duplex formations measured in 1 M NaCl–phosphate buffer<sup>a</sup>

| Sequence (5' → 3')                                         | $-\Delta H^\circ$<br>(kcal mol <sup>-1</sup> ) | $-\Delta S^\circ$<br>(cal mol <sup>-1</sup> K <sup>-1</sup> ) | $-\Delta G^\circ_{37}$<br>(kcal mol <sup>-1</sup> ) | $T_m$<br>(°C) |
|------------------------------------------------------------|------------------------------------------------|---------------------------------------------------------------|-----------------------------------------------------|---------------|
| GTGTAA <sup>phe</sup> ATGTC<br>/ GACATFTACAC               | 76.5±1.9                                       | 216±6                                                         | 9.53±0.22                                           | 49.6          |
| GTGTTA <sup>phe</sup> TTGTC<br>/ GACAAFAACAC               | 79.0±1.5                                       | 225±5                                                         | 9.10±0.14                                           | 47.4          |
| GTGTGA <sup>phe</sup> GTGTC<br>/ GACACFCACAC               | 74.4±1.9                                       | 205±6                                                         | 10.9±0.3                                            | 56.6          |
| GTGTCA <sup>phe</sup> CTGTC <sup>b</sup><br>/ GACAGFGACAC  | 73.4                                           | 203                                                           | 10.4                                                | 54.9          |
| GTGTCA <sup>naph</sup> CTGTC <sup>b</sup><br>/ GACAGTGACAC | 76.5                                           | 209                                                           | 11.5                                                | 60.2          |
| GTGTAAATGTC<br>/ GACATTTACAC                               | 97.1±1.8                                       | 276±5                                                         | 11.6±0.2                                            | 54.1          |
| GTGTTATTGTC<br>/ GACAATAACAC                               | 86.2±1.5                                       | 242±5                                                         | 11.0±0.1                                            | 54.1          |

| Sequence (5' → 3')                            | $-\Delta H^\circ$<br>(kcal mol <sup>-1</sup> ) | $-\Delta S^\circ$<br>(cal mol <sup>-1</sup> K <sup>-1</sup> ) | $-\Delta G^\circ_{37}$<br>(kcal mol <sup>-1</sup> ) | $T_m$<br>(°C) |
|-----------------------------------------------|------------------------------------------------|---------------------------------------------------------------|-----------------------------------------------------|---------------|
| GTGTGAGTGTC<br>/ GACTCACAC                    | 92.6±2.3                                       | 256±7                                                         | 13.2±0.3                                            | 61.0          |
| GTGTCACTGTC <sup>b</sup><br>/ GACAGTGACAC     | 89.0                                           | 248                                                           | 12.6                                                | 57.4          |
| GTGTCACTGTC <sup>b</sup><br>/ GACAGFGACAC     | 69.5                                           | 199                                                           | 7.4                                                 | 42.9          |
| GTGTAC <sup>phe</sup> ATGTC<br>/ GACATFTACAC  | 76.0±1.4                                       | 215±4                                                         | 9.25±0.14                                           | 48.5          |
| GTGTTT <sup>phe</sup> TTGTC<br>/ GACAAFAACAC  | 75.1±1.9                                       | 214±6                                                         | 8.91±0.23                                           | 47.1          |
| GTGTGC <sup>phe</sup> GTGTC<br>/ GACACFCACAC  | 82.7±1.3                                       | 231±4                                                         | 11.2±0.1                                            | 55.6          |
| GTGTCC <sup>phe</sup> CTGTC<br>/ GACAGFGACAC  | 67.5±5.9                                       | 185±18                                                        | 10.2±0.2                                            | 59.0          |
| GTGTCC <sup>naph</sup> CTGTC<br>/ GACAGFGACAC | 75.1±4.8                                       | 207±15                                                        | 11.4±0.2                                            | 60.8          |
| GTGTACATGTC<br>/ GACATGTACAC                  | 89.4±1.7                                       | 250±5                                                         | 11.9±0.2                                            | 56.8          |
| GTGTTCTTGTC<br>/ GACAAGAACAC                  | 82.6±1.7                                       | 229±5                                                         | 11.5±0.2                                            | 56.8          |
| GTGTGCGTGTC<br>/ GACACGCACAC                  | 89.6±1.8                                       | 243±5                                                         | 14.3±0.2                                            | 66.3          |
| GTGTCCCTGTC<br>/ GACAGGGACAC                  | 85.7±3.5                                       | 235±10                                                        | 12.9±0.3                                            | 65.3          |
| GTGTCCCTGTC<br>/ GACAGFGACAC                  | 64.3±3.9                                       | 180±12                                                        | 7.84±0.16                                           | 45.2          |

<sup>a</sup>Data was obtained using the buffer containing 1 M NaCl, 10 mM Na<sub>2</sub>HPO<sub>4</sub> (pH 7.0), and 1 mM Na<sub>2</sub>EDTA. The error values were calculated from the difference between the parameters determined by the  $T_m^{-1}$  versus log ( $C_i/4$ ) plot and curve fitting to the two-state model.  $T_m$  was calculated at 100 μM.

<sup>b</sup>Data are derived from the reference 19.

**Table S2** Thermodynamic parameters of self-complementary DNA duplexes measured in 1 M NaCl–phosphate buffer<sup>a</sup>

| Sequence (5' → 3')                             | $-\Delta H^\circ$<br>(kcal mol <sup>-1</sup> ) | $-\Delta S^\circ$<br>(cal mol <sup>-1</sup> K <sup>-1</sup> ) | $-\Delta G^\circ_{37}$<br>(kcal mol <sup>-1</sup> ) | $T_m$<br>(°C) |
|------------------------------------------------|------------------------------------------------|---------------------------------------------------------------|-----------------------------------------------------|---------------|
| Core sequence 1                                |                                                |                                                               |                                                     |               |
| ATGCGCAT <sup>b</sup>                          | 62.0                                           | 171                                                           | 9.3                                                 | 54.3          |
| <u>A</u> ATGCGCAT <sup>b</sup>                 | 64.6                                           | 175                                                           | 10.2                                                | 60.9          |
| <u>A</u> <sup>phe</sup> ATGCGCAT <sup>b</sup>  | 53.9                                           | 138                                                           | 11.1                                                | 72.5          |
| <u>A</u> <sup>naph</sup> ATGCGCAT <sup>b</sup> | 56.8                                           | 146                                                           | 11.5                                                | 72.7          |
| <u>A</u> ATGCGCAT <u>T</u> <sup>b</sup>        | 75.8                                           | 208                                                           | 11.2                                                | 61.2          |
| ATGCGCAT <u>A</u> <sup>b</sup>                 | 63.1                                           | 171                                                           | 10.0                                                | 60.1          |
| ATGCGCAT <u>A</u> <sup>phe b</sup>             | 56.2                                           | 148                                                           | 10.1                                                | 64.1          |
| ATGCGCAT <u>A</u> <sup>naph b</sup>            | 53.1                                           | 138                                                           | 10.3                                                | 66.8          |
| <u>T</u> ATGCGCAT <u>A</u>                     | 73.6±2.8                                       | 203±9                                                         | 10.7±0.2                                            | 59.8          |
| <u>C</u> ATGCGCAT                              | 65.9±3.2                                       | 183±10                                                        | 9.48±0.15                                           | 55.1          |
| <u>C</u> <sup>phe</sup> ATGCGCAT               | 69.2±1.7                                       | 170±5                                                         | 11.3±0.1                                            | 65.5          |
| <u>C</u> <sup>naph</sup> ATGCGCAT              | 65.4±2.0                                       | 174±6                                                         | 11.3±0.2                                            | 66.6          |
| <u>C</u> ATGCGCAT <u>G</u>                     | 74.3±2.7                                       | 206±8                                                         | 10.9±0.3                                            | 59.9          |
| ATGCGCAT <u>C</u>                              | 63.8±2.9                                       | 177±8                                                         | 8.94±0.09                                           | 53.5          |
| ATGCGCAT <u>C</u> <sup>phe</sup>               | 64.0±2.6                                       | 173±8                                                         | 10.3±0.1                                            | 61.6          |
| ATGCGCAT <u>C</u> <sup>naph</sup>              | 57.6±2.2                                       | 153±6                                                         | 10.3±0.2                                            | 63.9          |
| <u>G</u> ATGCGCAT <u>C</u>                     | 73.0±4.8                                       | 203±15                                                        | 10.3±0.2                                            | 57.3          |
| Core sequence 2                                |                                                |                                                               |                                                     |               |
| TGCGCA <sup>b</sup>                            | 47.4                                           | 129                                                           | 7.6                                                 | 50.3          |
| <u>A</u> TGCGCA <sup>b</sup>                   | 55.0                                           | 151                                                           | 8.2                                                 | 51.4          |
| <u>A</u> <sup>phe</sup> TGCGCA                 | 55.1±2.3                                       | 145±7                                                         | 10.2±0.2                                            | 64.1          |
| <u>A</u> <sup>naph</sup> TGCGCA                | 51.5±3.3                                       | 133±10                                                        | 10.2±0.2                                            | 67.1          |
| <u>A</u> TGCGCAT <u>T</u> <sup>b</sup>         | 62.0                                           | 171                                                           | 9.3                                                 | 54.3          |
| TGCGCA <u>A</u>                                | 48.2±4.0                                       | 132±12                                                        | 7.39±0.25                                           | 47.6          |
| TGCGCA <u>A</u> <sup>phe</sup>                 | 48.6±3.4                                       | 131±11                                                        | 7.96±0.16                                           | 53.0          |
| TGCGCA <u>A</u> <sup>naph</sup>                | 46.7±2.6                                       | 126±8                                                         | 7.77±0.10                                           | 50.9          |
| <u>T</u> TGCGCA <u>A</u>                       | 57.4±4.0                                       | 158±13                                                        | 8.64±0.18                                           | 52.9          |
| <u>C</u> TGCGCA                                | 57.1±3.4                                       | 159±10                                                        | 7.66±0.13                                           | 48.1          |
| <u>C</u> <sup>phe</sup> TGCGCA                 | 57.3±6.0                                       | 154±9                                                         | 9.49±0.09                                           | 59.0          |
| <u>C</u> <sup>naph</sup> TGCGCA                | 52.6±3.0                                       | 140±9                                                         | 9.35±0.18                                           | 61.5          |
| <u>C</u> TGCGCAG                               | 62.3±5.1                                       | 171±15                                                        | 9.36±0.18                                           | 56.5          |
| TGCGC <u>A</u> <u>C</u>                        | 37.8±2.8                                       | 98.6±9.0                                                      | 6.92±0.19                                           | 49.5          |
| TGCGC <u>A</u> <u>C</u> <sup>phe</sup>         | 55.7±2.0                                       | 151±6                                                         | 8.49±0.16                                           | 53.1          |
| TGCGC <u>A</u> <u>C</u> <sup>naph</sup>        | 54.4±2.9                                       | 148±9                                                         | 8.78±0.15                                           | 54.1          |
| <u>G</u> TGCGC <u>A</u> <u>C</u>               | 58.7±1.9                                       | 156±6                                                         | 9.94±0.05                                           | 62.3          |

| Sequence (5' → 3')                | $-\Delta H^\circ$<br>(kcal mol <sup>-1</sup> ) | $-\Delta S^\circ$<br>(cal mol <sup>-1</sup> K <sup>-1</sup> ) | $-\Delta G^\circ_{37}$<br>(kcal mol <sup>-1</sup> ) | $T_m$<br>(°C) |
|-----------------------------------|------------------------------------------------|---------------------------------------------------------------|-----------------------------------------------------|---------------|
| Core sequence 3                   |                                                |                                                               |                                                     |               |
| GTGCGCAC                          | 58.7±1.9                                       | 156±6                                                         | 9.94±0.05                                           | 62.3          |
| <u>AGT</u> GCGCAC                 | 70.2±1.7                                       | 189±3                                                         | 11.5±0.2                                            | 65.1          |
| <u>A<sup>phe</sup></u> GCGCAC     | 65.7±2.8                                       | 171±8                                                         | 12.7±0.2                                            | 74.0          |
| <u>A<sup>naph</sup></u> GCGCAC    | 66.6±1.3                                       | 174±4                                                         | 12.9±0.2                                            | 73.8          |
| <u>AGT</u> GCGCA <u>T</u>         | 75.7±1.6                                       | 204±4                                                         | 12.5±0.1                                            | 67.3          |
| GTGCGCACA <u>A</u>                | 71.9±1.7                                       | 194±5                                                         | 11.9±0.1                                            | 66.3          |
| GTGCGCACA <u>A<sup>phe</sup></u>  | 68.4±2.7                                       | 184±8                                                         | 11.5±0.2                                            | 65.6          |
| GTGCGCACA <u>A<sup>naph</sup></u> | 67.0±3.1                                       | 178±9                                                         | 11.9±0.3                                            | 68.5          |
| <u>TGT</u> GCGCACA <u>A</u>       | 72.2±2.5                                       | 193±7                                                         | 12.5±0.1                                            | 69.1          |
| <u>CGT</u> GCGCAC                 | 69.2±1.7                                       | 188±5                                                         | 10.9±0.1                                            | 62.1          |
| <u>C<sup>phe</sup></u> GCGCAC     | 73.5±1.6                                       | 196±4                                                         | 12.9±0.1                                            | 70.5          |
| <u>C<sup>naph</sup></u> GCGCAC    | 71.6±2.3                                       | 190±7                                                         | 12.8±0.2                                            | 71.3          |
| <u>CGT</u> GCGCAG <u>C</u>        | 79.8±2.1                                       | 214±6                                                         | 13.5±0.2                                            | 70.7          |
| GTGCGCACC <u>C</u>                | 67.5±1.8                                       | 182±5                                                         | 10.9±0.1                                            | 63.2          |
| GTGCGCACC <u>C<sup>phe</sup></u>  | 71.7±1.8                                       | 192±5                                                         | 12.3±0.1                                            | 68.3          |
| GTGCGCACC <u>C<sup>naph</sup></u> | 67.6±2.2                                       | 179±6                                                         | 12.1±0.2                                            | 69.5          |
| <u>GGT</u> GCGCACC <u>C</u>       | 76.0±2.5                                       | 203±7                                                         | 13.1±0.2                                            | 70.9          |
| Core sequence 4                   |                                                |                                                               |                                                     |               |
| CTGCGCAG                          | 62.3±5.1                                       | 171±15                                                        | 9.36±0.18                                           | 56.5          |
| <u>ACT</u> GCGCAG                 | 70.4±3.4                                       | 192±10                                                        | 10.9±0.2                                            | 61.7          |
| <u>A<sup>phe</sup></u> CTGCGCAG   | 67.9±2.9                                       | 179±9                                                         | 12.4±0.2                                            | 71.3          |
| <u>A<sup>naph</sup></u> CTGCGCAG  | 76.0±2.7                                       | 203±7                                                         | 13.1±0.1                                            | 70.5          |
| <u>ACT</u> GCGCAG <u>T</u>        | 82.2±2.0                                       | 225±6                                                         | 12.3±0.2                                            | 64.0          |
| CTGCGCAGA <u>A</u>                | 65.9±1.9                                       | 180±6                                                         | 10.3±0.1                                            | 59.5          |
| CTGCGCAGA <u>A<sup>phe</sup></u>  | 60.7±2.3                                       | 161±7                                                         | 10.9±0.2                                            | 65.4          |
| CTGCGCAGA <u>A<sup>naph</sup></u> | 66.4±3.1                                       | 178±9                                                         | 11.2±0.2                                            | 64.8          |
| <u>TCT</u> GCGCAGA <u>A</u>       | 78.1±3.2                                       | 214±10                                                        | 11.8±0.2                                            | 62.6          |
| <u>CCT</u> GCGCAG                 | 61.7±2.8                                       | 167±9                                                         | 10.0±0.2                                            | 59.3          |
| <u>C<sup>phe</sup></u> CTGCGCAG   | 76.6±2.2                                       | 207±6                                                         | 12.5±0.2                                            | 66.6          |
| <u>C<sup>naph</sup></u> CTGCGCAG  | 73.0±3.1                                       | 195±9                                                         | 12.6±0.2                                            | 69.1          |
| <u>CCT</u> GCGCAG <u>G</u>        | 78.3±2.0                                       | 212±6                                                         | 12.7±0.2                                            | 67.5          |
| CTGCGCAGC <sup>c</sup>            | nd.                                            | nd.                                                           | nd.                                                 | nd.           |
| CTGCGCAGC <sup>phe</sup>          | 58.5±3.6                                       | 155±10                                                        | 10.4±0.3                                            | 64.0          |
| CTGCGCAGC <sup>naph</sup>         | 54.7±4.1                                       | 144±12                                                        | 10.2±0.3                                            | 65.2          |
| <u>GCT</u> GCGCAGC <sup>c</sup>   | nd.                                            | nd.                                                           | nd.                                                 | nd.           |

<sup>a</sup> Data was obtained using the buffer containing 1 M NaCl, 10 mM Na<sub>2</sub>HPO<sub>4</sub> (pH 7.0), and 1 mM Na<sub>2</sub>EDTA.  $T_m$  was calculated at 100 μM.

<sup>b</sup> Data are derived from the references 10 and 18.



**Table S3** Thermodynamic parameters of DNA duplexes forming 2 or 3 nucleotide dangling ends measured in 1 M NaCl–phosphate buffer<sup>a</sup>

| Sequence (5' → 3')                                          | $\Delta H^\circ$<br>(kcal mol <sup>-1</sup> ) | $\Delta S^\circ$<br>(cal mol <sup>-1</sup> K <sup>-1</sup> ) | $\Delta G^\circ_{37}$<br>(kcal mol <sup>-1</sup> ) | $T_m$<br>(°C) |
|-------------------------------------------------------------|-----------------------------------------------|--------------------------------------------------------------|----------------------------------------------------|---------------|
| <u>A</u> <sub>2</sub> ATGCGCAT <sup>b</sup>                 | -65.0                                         | -176                                                         | -10.3                                              | 61.3          |
| <u>A</u> <sub>3</sub> ATGCGCAT <sup>b</sup>                 | -65.5                                         | -178                                                         | -10.4                                              | 60.4          |
| <u>A</u> <sup>phe</sup> <sub>2</sub> ATGCGCAT <sup>b</sup>  | -63.5                                         | -165                                                         | -12.2                                              | 72.8          |
| <u>A</u> <sup>phe</sup> <sub>3</sub> ATGCGCAT               | -73.1±2.5                                     | -194±7                                                       | -12.9±0.1                                          | 71.5          |
| <u>A</u> <sup>naph</sup> <sub>2</sub> ATGCGCAT <sup>b</sup> | -64.9                                         | -168                                                         | -12.9                                              | 76.7          |
| <u>A</u> <sup>naph</sup> <sub>3</sub> ATGCGCAT              | -78.6±2.2                                     | -206±6                                                       | -14.6±0.3                                          | 76.7          |
| <u>C</u> <sub>2</sub> ATGCGCAT                              | -68.0±3.1                                     | -188±9                                                       | -9.63±0.07                                         | 56.3          |
| <u>C</u> <sub>3</sub> ATGCGCAT                              | -72.2±3.5                                     | -202±10                                                      | -9.62±0.05                                         | 54.9          |
| <u>C</u> <sup>phe</sup> <sub>2</sub> ATGCGCAT               | -70.7±3.9                                     | -191±12                                                      | -11.5±0.2                                          | 64.7          |
| <u>C</u> <sup>phe</sup> <sub>3</sub> ATGCGCAT               | -64.8±2.9                                     | -173±9                                                       | -11.1±0.2                                          | 65.6          |
| <u>C</u> <sup>naph</sup> <sub>2</sub> ATGCGCAT              | -66.3±2.6                                     | -178±7                                                       | -11.3±0.3                                          | 65.2          |
| <u>C</u> <sup>naph</sup> <sub>3</sub> ATGCGCAT              | -62.2±1.7                                     | -165±5                                                       | -11.3±0.3                                          | 67.0          |

<sup>a</sup> Melting curve was obtained with the buffer containing 1 M NaCl, 10 mM Na<sub>2</sub>HPO<sub>4</sub> (pH 7.0), and 1 mM Na<sub>2</sub>EDTA.  $T_m$  was calculated at 100 μM.

<sup>b</sup> Data are derived from the references 10 and 18.

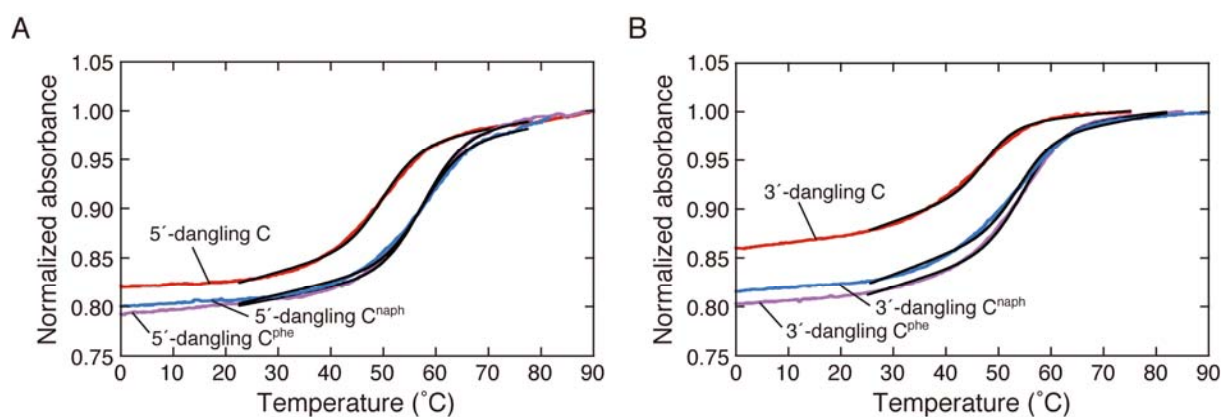

**Fig. S1** Melting curve of the DNA duplexes forming a dangling end of C (red), C<sup>phe</sup> (violet), or C<sup>naph</sup> (blue) at the 5' end (A) or the 3' end (B) of the core sequence of ATGCGCAT, monitored at 260 nm. The curves were obtained with 10  $\mu$ M DNA in 1 M NaCl–phosphate buffer. The fits to a two–state model are indicated in a black line.
